# Supplementary material for: YfiB: An Outer Membrane Protein Involved in the Virulence of Shigella flexneri
Source: MDPI journal article supplement (doi:10.3390/microorganisms10030653), 2022-03-18

**Supplementary Figure S2. The *in-silico* investigation of the YfiB protein. (A)** Clustal-Omega multiple sequence alignment of YfiB protein homologs found in various Gram-negative bacteria, showing conserved and non-conserved amino acid residues.

|          |                               |                                                       |
|----------|-------------------------------|-------------------------------------------------------|
| <b>A</b> | YfiB_Citrobacter              | -----MKS YGF                                          |
|          | YfiB_Enterobacter             | -----MLKRYFAPLLLASLVISGCQT--SPEGKFTPEQIAAMKSYGF       |
|          | YfiB_E.coli                   | -----MIKHLVAPLIFTSLILTGCQ--SPQGKFTPEQVAAMQSYGF        |
|          | YfiB_S.dysenteriae            | -----MIKHLVAPLIFTSLILTGCQ--SPQGKFTPEQVAAMQSYGF        |
|          | YfiB_S.flexneri_X             | -----MIKHLVAPLIFTSLILTGCQ--SPQGKFTPEQVAAMQSYGF        |
|          | YfiB_S.sonnei                 | -----MIKHLVAPLIFTSLILTGCQ--SPQGKFTPEQVAAMQSYGF        |
|          | YfiB_SFL1613/Y394             | -----MIKHLVAPLIFTSLILTGCQ--SPQGKFTPEQVAAMQSYGF        |
|          | YfiB_S.boydii                 | -----MQSYGF                                           |
|          | YfiB_Klebsiella_pneumoniae    | -----MIRKYFVPALMAAALLTGCQ--APQGKFTPEQVAAMKSYGF        |
|          | YfiB_Xenorhabdus              | -----MSKKRSFMFICAFIGTLFLSACQ---NKGGLTAEQITTLKQGGF     |
|          | YfiB_Pseudomonas_chlororaphis | -----MQLFTAGLLALLSLTGCQSVPP--KGLTPQQVAVLKQEGF         |
|          | YfiB_Pseudomonas_aeruginosa   | --MLPQRLHPSRLALALFLSLVLGLAGCQTKPPQTGLSAEQIAVLQEGGF    |
|          | YfiB_Yersinia_enterocolitica  | MLGLNNNRQKNPLWISFFALCLLVLVGCQAKPH--QGLTPEQIAALQEGGF   |
|          | YfiB_Serratia                 | --MIQQTLLKNRFSLLAMMFIALLALAGCQSKPQ--GLTPEQIALLQSGGF   |
|          | YfiB_Aeromonas                | -----MGMFALLLAGCQ--SPPAGRLNETQIALLLKARGF              |
|          | YfiB_Acinetobacter_baumannii  | -----MKLSFIALLCIALAGCLS---FGPLKYRQVKMLKKEGF           |
|          |                               | :: **                                                 |
|          | YfiB_Citrobacter              | TEASGDWSLGLSDNILFDKNDYKLRPESEKQIKEMASKLAATGLNHARLD    |
|          | YfiB_Enterobacter             | NELNGDWSLGLSDKILFDKNDARLRPESETQITQTHASRLAATGLNHARM    |
|          | YfiB_E.coli                   | TESAGDWSLGLSDAILFAKNDYKLLPESQQQTQTHAAKLASTGLTHARM     |
|          | YfiB_S.dysenteriae            | TESAGDWSLGLSDAILFAKNDYKLLPESQQQTQTHAAKLASTGLTHARM     |
|          | YfiB_S.flexneri_X             | TESAGDWSLGLSDAILFAKNDYKLLPESQQQTQTHAAKLASTGLTHARM     |
|          | YfiB_S.sonnei                 | TESAGDWSLGLSDAILFAKNDYKLLPESQQQTQTHAAKLASTGLTHARM     |
|          | YfiB_SFL1613/Y394             | TESAGDWSLGLSDAILFAKNDYKLLPESQQQTQTHAAKLASTGLTHARM     |
|          | YfiB_S.boydii                 | TESAGDWSLGLSDAILFAKNDYKLLPESQQQTQTHAAKLASTGLTHARM     |
|          | YfiB_Klebsiella_pneumoniae    | TESNGDWSLGLSDSILFDKNDYRLRPOSQQITTHASRLAATGITHSRLE     |
|          | YfiB_Xenorhabdus              | QQTDEGWLFMGSEKVLFGNNQSHLRPEGEAKLKEASVLSKVGIHARLD      |
|          | YfiB_Pseudomonas_chlororaphis | ELTDEGWAFGLSGKVLFGSDIETLNAASTEIVERIGKALVSVHIDKVRVD    |
|          | YfiB_Pseudomonas_aeruginosa   | ELRDEGWAFGLSGKVLFGNNLDRLNPDOSRNTLTKEARALLAVDIDKVRLE   |
|          | YfiB_Yersinia_enterocolitica  | KLTDNGWAFGLANKVLFDSDVRKLNASGVQTVQNTGRALHNVDINHRVD     |
|          | YfiB_Serratia                 | KLTDNGWAFGLSDKVLFGNNVGKLNPESTDVQKMGKRALMSVGITQFRLD    |
|          | YfiB_Aeromonas                | TQVEEGWSLGLSDRVLFANESRTLNPDOSRAVQKTAHSLLSVGDWARLD     |
|          | YfiB_Acinetobacter_baumannii  | VLTNEGWTGLPERLLDFDNATLKQSHAEALTRLANQNLNKYDLNKLKIV     |
|          |                               | . * : * : . : * : : * : : : : *                       |
|          | YfiB_Citrobacter              | GHTDNYGEDSYNEALS LK RANVVADAWAQGANIPRNLTTQGLGKKYPIA   |
|          | YfiB_Enterobacter             | GHTDNYGEESYNEALS LK RANVVADAWAKGANIPRNLTTQGLGKKYPVS   |
|          | YfiB_E.coli                   | GHTDNYGEDSYNEGLSLK RANVVADAWAMGGQIPRNLTTQGLGKKYPIA    |
|          | YfiB_S.dysenteriae            | GHTDNYGEDSYNEGLSLK RANVVADAWAMGGQIPRNLTTQGLGKNIP--    |
|          | YfiB_S.flexneri_X             | GHTDNYGEDSYNEGLSLK RANVVADAWAIGGQIPRNLTTQGLGKKYPIA    |
|          | YfiB_S.sonnei                 | GHTDNYGEDSYNEGLSLK RANVVADAWAIGGQIPRNLTTQGLGKKYPIA    |
|          | YfiB_SFL1613/Y394             | GHTDNYGEDSYNEGLSLK RANVVADAWAIGGQIPRNLTTQGLGKKYPIA    |
|          | YfiB_S.boydii                 | GHTDNYGEDSYNEGLSLK RANVVADAWAMGGQIPRNLTTQGLGKKYPIA    |
|          | YfiB_Klebsiella_pneumoniae    | GHTDNYGEDSYNEALS LK RANVSADAWAEGAHVPSRNLVTRGLGKKIPDR  |
|          | YfiB_Xenorhabdus              | GHTDNYGEVSYNNQLSLK RANTVADALTDGG--MQRANLTTRGLGPSQPIA  |
|          | YfiB_Pseudomonas_chlororaphis | GHTDASGREAYNQQLSLRRAKSVSKVLVATG--HREENIQLRGLGSSEPPA   |
|          | YfiB_Pseudomonas_aeruginosa   | GHTDNYGDEGYNQKL SERRAESVAAVFREAG--MPAANI EVRGLGMSKPVA |
|          | YfiB_Yersinia_enterocolitica  | GHTDAIGEDGYNQQLSFQRASAVADTLAAIG--IPRTNIEVRGRGKLEPVA   |
|          | YfiB_Serratia                 | GHTDNYGEDSYNDQLSLRRANAVADLLASVG--IPRANIETRGMGKRDPA    |
|          | YfiB_Aeromonas                | GHTDSNGDESYNQQLSRQRAQSVADSLIDAG--MPVANLEVRGLGERYPVA   |
|          | YfiB_Acinetobacter_baumannii  | GHTDDVGNPEYNQKLSEERAQSVANLFLTHG--FKKENIYVIGRSTQPYV    |
|          |                               | **** * ** : * : . * : : * : * *                       |
|          | YfiB_Citrobacter              | SN-----QTSKGRAENRRVAVVITP-----                        |
|          | YfiB_Enterobacter             | SN-----HTAQGRAENRRVAVVISTP-----                       |
|          | YfiB_E.coli                   | SN-----KTAQGRAENRRVAVVITP-----                        |
|          | YfiB_S.dysenteriae            | -----                                                 |
|          | YfiB_S.flexneri_X             | SN-----KTAQGRAENRRVAVVIATP-----                       |
|          | YfiB_S.sonnei                 | SN-----KTAQGRAENRRVAVVITP-----                        |
|          | YfiB_SFL1613/Y394             | SN-----KTAQGRAENRRVAVVITP-----                        |
|          | YfiB_S.boydii                 | SN-----KTAQGRAENRRVAVVITP-----                        |
|          | YfiB_Klebsiella_pneumoniae    | QQRHGGRRARRKPPGNGGHQHAVSLRLVAGLHHPHCRCRAPAQVVGNEQQ    |
|          | YfiB_Xenorhabdus              | DN-----RSSKGRAENRRVAIVITAP-----                       |
|          | YfiB_Pseudomonas_chlororaphis | SN-----STVAGRTEENRRVSIIVIAD-----                      |
|          | YfiB_Pseudomonas_aeruginosa   | DN-----KTRAGRSENRRAVIVPAE-----                        |
|          | YfiB_Yersinia_enterocolitica  | DN-----RTAKGRAENRRVAIVTAP-----                        |
|          | YfiB_Serratia                 | DN-----RTSSGRVENRRVAIVVTP-----                        |
|          | YfiB_Aeromonas                | SN-----KTREGRSQNRRAIVITD-----                         |
|          | YfiB_Acinetobacter_baumannii  | PN-----TTNENRAINRRVAIVIIP-----                        |
|          | YfiB_Citrobacter              | -----                                                 |
|          | YfiB_Enterobacter             | -----                                                 |
|          | YfiB_E.coli                   | -----                                                 |
|          | YfiB_S.dysenteriae            | -----                                                 |
|          | YfiB_S.flexneri_X             | -----                                                 |
|          | YfiB_S.sonnei                 | -----                                                 |
|          | YfiB_SFL1613/Y394             | -----                                                 |
|          | YfiB_S.boydii                 | -----                                                 |
|          | YfiB_Klebsiella_pneumoniae    | QAGSH                                                 |
|          | YfiB_Xenorhabdus              | -----                                                 |
|          | YfiB_Pseudomonas_chlororaphis | -----                                                 |
|          | YfiB_Pseudomonas_aeruginosa   | -----                                                 |
|          | YfiB_Yersinia_enterocolitica  | -----                                                 |
|          | YfiB_Serratia                 | -----                                                 |
|          | YfiB_Aeromonas                | -----                                                 |
|          | YfiB_Acinetobacter_baumannii  | -----                                                 |

**Supplementary Figure S2. The *in-silico* investigation of the YfiB protein. (b)** Weblogo representations of the YfiB protein amino acid conservation. The height of amino acid code at each position reflects the comparative incidence of the amino acid at that position and the total height of the pile denotes the degree of conservation at each individual locus (measured in bits). The consensus sequence was derived from multiple sequence alignment of YfiB protein sequences from various Gram-negative bacteria.

B

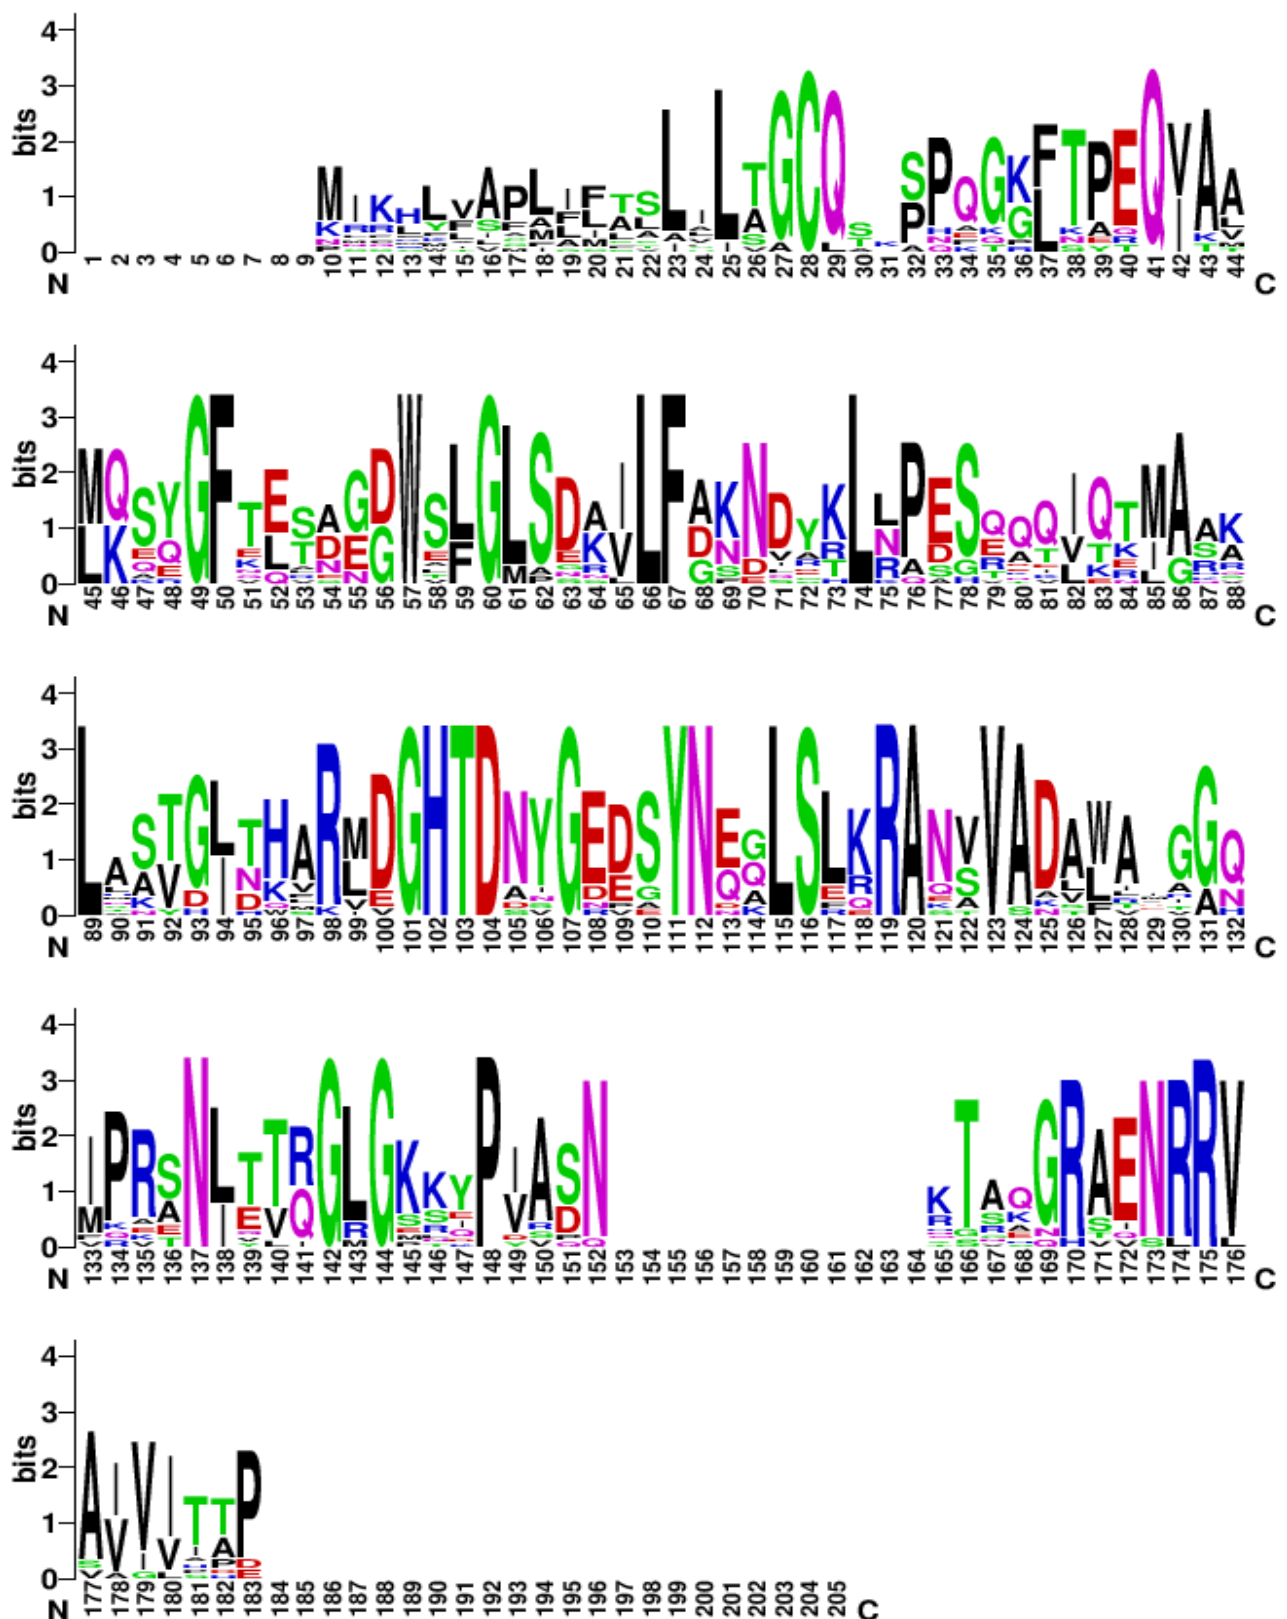

**Supplementary Figure S2. The *in-silico* investigation of the YfiB protein.** (c) Phylogenetic tree illustrating the evolutionary distance between the YfiB protein homologs from various gram-negative bacteria. Clustal-Omega alignment of the homologs was used to generate this phylogenetic tree and was created using the MEGA software, calculated by the Maximum Composite Likelihood method.

C

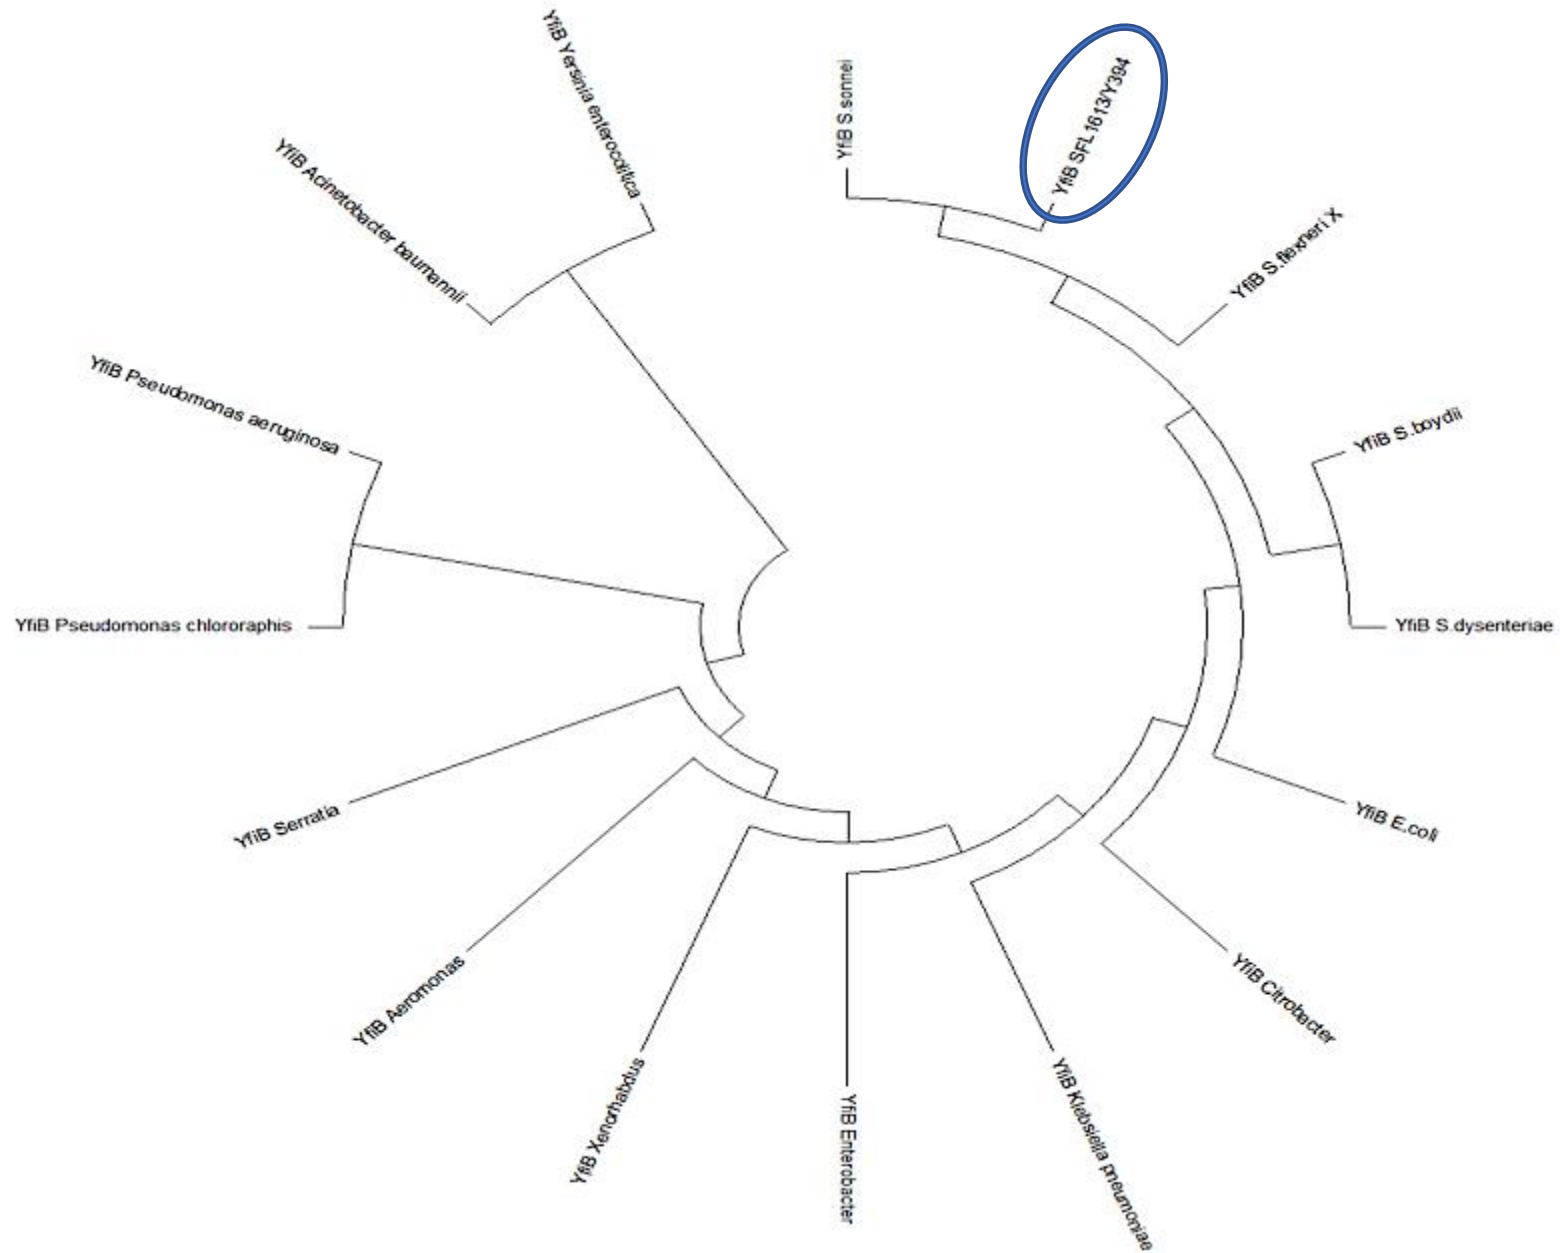

Supplement: s1 [file s1]
