# Supplementary material for: YfiB: An Outer Membrane Protein Involved in the Virulence of Shigella flexneri
Source: MDPI journal article supplement (doi:10.3390/microorganisms10030653), 2022-03-18
Supplement: s1 [file s1]

## **Supplementary materials**

### **YfiB: An Outer Membrane Protein Involved in the Virulence of *Shigella flexneri***

Tanuka Sen (1), Naresh K Verma (1)\*

#### **Authors affiliation**

Division of Biomedical Science and Biochemistry, Research School of Biology, The Australian National University, ACT, Canberra, Australia.

**Corresponding author:** Naresh K. Verma.

This file includes Tables S1, S2, and S3.

Table S1- Bacterial strains and plasmids used in this study.

| Name                            | Description                                                                                     | Antibiotic Resistance |
|---------------------------------|-------------------------------------------------------------------------------------------------|-----------------------|
| <b><i>Shigella flexneri</i></b> |                                                                                                 |                       |
| SFL1613/Y394                    | <i>S. flexneri</i> 1c strain <sup>33</sup>                                                      | -                     |
| SFL2608 (1c WT)                 | SFL1613/Y394 with pKD46 helper plasmid.<br>Wildtype used for this study.                        | Amp                   |
| SFL2641/ $\Delta$ YfiB          | SFL2606 (1c WT) with <i>yfiB</i> gene deleted                                                   | CM                    |
| SFL2642/YfiBComp                | SFL2641 with <i>yfiB</i> gene complemented, cloned into pBAD_Myc_HisA vector                    | Amp, Ery, CM          |
| SFL2645                         | SFL 2641 with site directed mutant- Cys19Gln20-> Ala19Glu20, cloned into pBAD_Myc_HisA vector.  | Amp, Ery, CM          |
| SFL2646                         | SFL 2641 with site directed mutant- Pro22Gln23-> Ala22Glu23, cloned into pBAD_Myc_HisA vector.  | Amp, Ery, CM          |
| SFL2647                         | SFL 2641 with site directed mutant- Glu29Gln30 -> Ala29Glu30, cloned into pBAD_Myc_HisA vector. | Amp, Ery, CM          |
| SFL2648                         | SFL 2641 with site directed mutant- Ser36-> Ala36, cloned into pBAD_Myc_HisA vector.            | Amp, Ery, CM          |
| SFL2650                         | SFL 2641 with empty pBAD_Myc_HisA vector                                                        | Amp, Ery, CM          |
| <b><i>E. coli</i></b>           |                                                                                                 |                       |
| B2298                           | OP50 <i>E. coli</i> strain                                                                      | -                     |
| <b>Plasmids</b>                 |                                                                                                 |                       |
| pKD46                           | Helper plasmid expressing the lambda red genes ( <i>gam</i> , <i>beta</i> , and <i>exo</i> )    | Amp                   |
| pKD3                            | Used for template generation for homologous recombination.                                      | Cm                    |
| pBAD_Myc_HisA                   | Vector used for cloning <i>yfiB</i> gene, used as control empty vector.                         | Amp, Ery              |
| pBAD_Myc_HisA_YfiB              | pBAD_Myc_HisA with <i>yfiB</i> gene cloned at the <i>NcoI</i> and <i>HindIII</i> .              | Amp, Ery              |
| pBAD_Myc_HisA_M1                | pBAD_Myc_HisA with mutant YfiB (Cys19Gln20 -> Ala19Gln20)                                       | Amp, Ery              |
| pBAD_Myc_HisA_M2                | pBAD_Myc_HisA with mutant YfiB (Pro22Gln23 -> Ala22Glu23)                                       | Amp, Ery              |
| pBAD_Myc_HisA_M3                | pBAD_Myc_HisA with mutant YfiB (Glu29Gln30 -> Ala29Glu30)                                       | Amp, Ery              |
| pBAD_Myc_HisA_M4                | pBAD_Myc_HisA with mutant YfiB (Ser36-> Ala36)                                                  | Amp, Ery              |

Table S2- Primers used in this study.

| Primer Name           | Role                                                                                                                           | Sequence                                                                                                                     |
|-----------------------|--------------------------------------------------------------------------------------------------------------------------------|------------------------------------------------------------------------------------------------------------------------------|
| <i>yfiB</i> _For      | Primer for amplifying the CM gene of pKD3, containing the 80bp overhangs, homologous to the upstream of the <i>yfiB</i> gene   | AAGAGCTTGCCGATCACAATATGTATCAGGCCAAACAC<br>CAGCGTG<br><br>CCGAAAAGCTGGTGAGATAACAAGGATATATCGATTA<br>CACGTCTT<br><br>GAGCGATTGT |
| <i>yfiB</i> _Rev      | Primer for amplifying the CM gene of pKD3, containing the 80bp overhangs, homologous to the downstream of the <i>yfiB</i> gene | GGCTGCTCGTATCAAAGAGCGTCTTAAGATTTCG<br>CTTAAGCGA<br><br>CATCCTGTTAAGAAGGGCTGGCCAATTGGCTGGGGTCC<br>ATATGAA<br><br>TATCCTCC     |
| <i>yfiB</i> _Test_For | Confirming deletion of <i>yfiB</i> gene                                                                                        | AGCCGATTCGTCACAATGGT                                                                                                         |
| <i>yfiB</i> _Test_Rev | Confirming deletion of <i>yfiB</i> gene                                                                                        | CTCCGGTAGTTGACAGCATT                                                                                                         |
| CM_Test               | Confirming deletion of <i>yfiB</i> gene and presence of chloramphenicol gene                                                   | CAACGGTGGTATATCCAGTG                                                                                                         |
| Apy_For               | Checking presence of <i>Shigella</i> 's Virulence plasmid                                                                      | CATAATCAAGAGACAAAACGATA                                                                                                      |
| Apy_Rev               | Checking presence of <i>Shigella</i> 's Virulence plasmid                                                                      | CCAGCCTTCCAGTAATCCC                                                                                                          |

Table S2- Primers used in this study.

|               |                                                                 |                       |
|---------------|-----------------------------------------------------------------|-----------------------|
| VirG_For      | Checking presence of <i>Shigella</i> 's Virulence plasmid       | CGGGTACTCAAGAACTTCAAT |
| VirG_Rev      | Checking presence of <i>Shigella</i> 's Virulence plasmid       | TTCCGCCAAAATGAGAGTTCC |
| pBAD_Univ_For | Primer to check for correct cloning in the pBAD_Myc_HisA vector | ATGCCATAGCATTTTTATCC  |
| pBAD_Uni_Rev  | Primer to check for correct cloning in the pBAD_Myc_HisA vector | GATTTAATCTGTATCAGG    |

Table S3- UniProt accession number of the YfiB protein sequences used in this study for in-silico analysis.

| UniProt ID <sup>b</sup> | Organism                                                 |
|-------------------------|----------------------------------------------------------|
| C3SYR2                  | <i>Escherichia coli</i>                                  |
| A0A377W1F8              | <i>Klebsiella pneumoniae</i>                             |
| A0A2X2HQ42              | <i>Shigella boydii</i>                                   |
| A0A2X2ISV4              | <i>Shigella dysenteriae</i>                              |
| D2AHI5                  | <i>Shigella flexneri</i> serotype X (strain 2002017)     |
| Q3YYN3                  | <i>Shigella sonnei</i> (strain Ss046)                    |
| A0A2I8JE62              | <i>Shigella flexneri</i> 1c strain (Y394)                |
| Q9I4L6                  | <i>Pseudomonas aeruginosa</i> (strain ATCC 15692)        |
| A0A3G7JRF7              | <i>Pseudomonas chlororaphis</i> subsp. <i>aurantiaca</i> |
| A0A7G2IWZ5              | <i>Citrobacter freundii</i>                              |
| A0A7U4NUK4              | <i>Acinetobacter baumannii</i>                           |
| A0A0S2SF47              | <i>Aeromonas schubertii</i>                              |
| G8LNV7                  | <i>Enterobacter ludwigii</i>                             |
| N1NGC1                  | <i>Xenorhabdus nematophila</i> F1                        |
| A0A1W5DTJ7              | <i>Serratia proteamaculans</i>                           |
| A0A485DSF5              | <i>Yersinia enterocolitica</i>                           |
