# Supplementary material for: YfiB: An Outer Membrane Protein Involved in the Virulence of Shigella flexneri
Source: MDPI journal article supplement (doi:10.3390/microorganisms10030653), 2022-03-18

**Supplementary Figure S3. Confirming protein expression of WT and mutant YfiB proteins.** (a) The sequence of the wildtype N-terminal linker and the three site-directed linker mutants. The amino acid pairs mutated, are highlighted in red. (b) The sequence of the wildtype YfiB activating domain with serine at position 36 and the mutant sequence with alanine at position 36, highlighted in red. (c) SDS gel stained with Coomassie blue dye for validating equal total protein loading for each sample. (d) Western transfer and blotting of the loaded SDS gel using the anti-HisA antibody to check for correct protein expression. YfiB is known to be a 17.2 kDa protein, WT YfiB protein sample and site directed mutants of YfiB, all show a band at the same location, above the 15 kDa band of the protein ladder. \*Lane 1- Pre-stained protein ladder (10-250 kDa); Lane 2- SFL2650 (empty pBAD\_Myc\_HisA vector); Lane 3- WT YfiB (SFL2642/YfiBComp); Lane 4- SFL2645 (Cys19Gln20->Ala19Glu20); Lane 5- SFL2646 (Pro22Gln23->Ala22Glu23); Lane 6- SFL2647 (Glu29Gln30->Ala29Glu30); & Lane 7- SFL2648 (Ser36->Ala36).

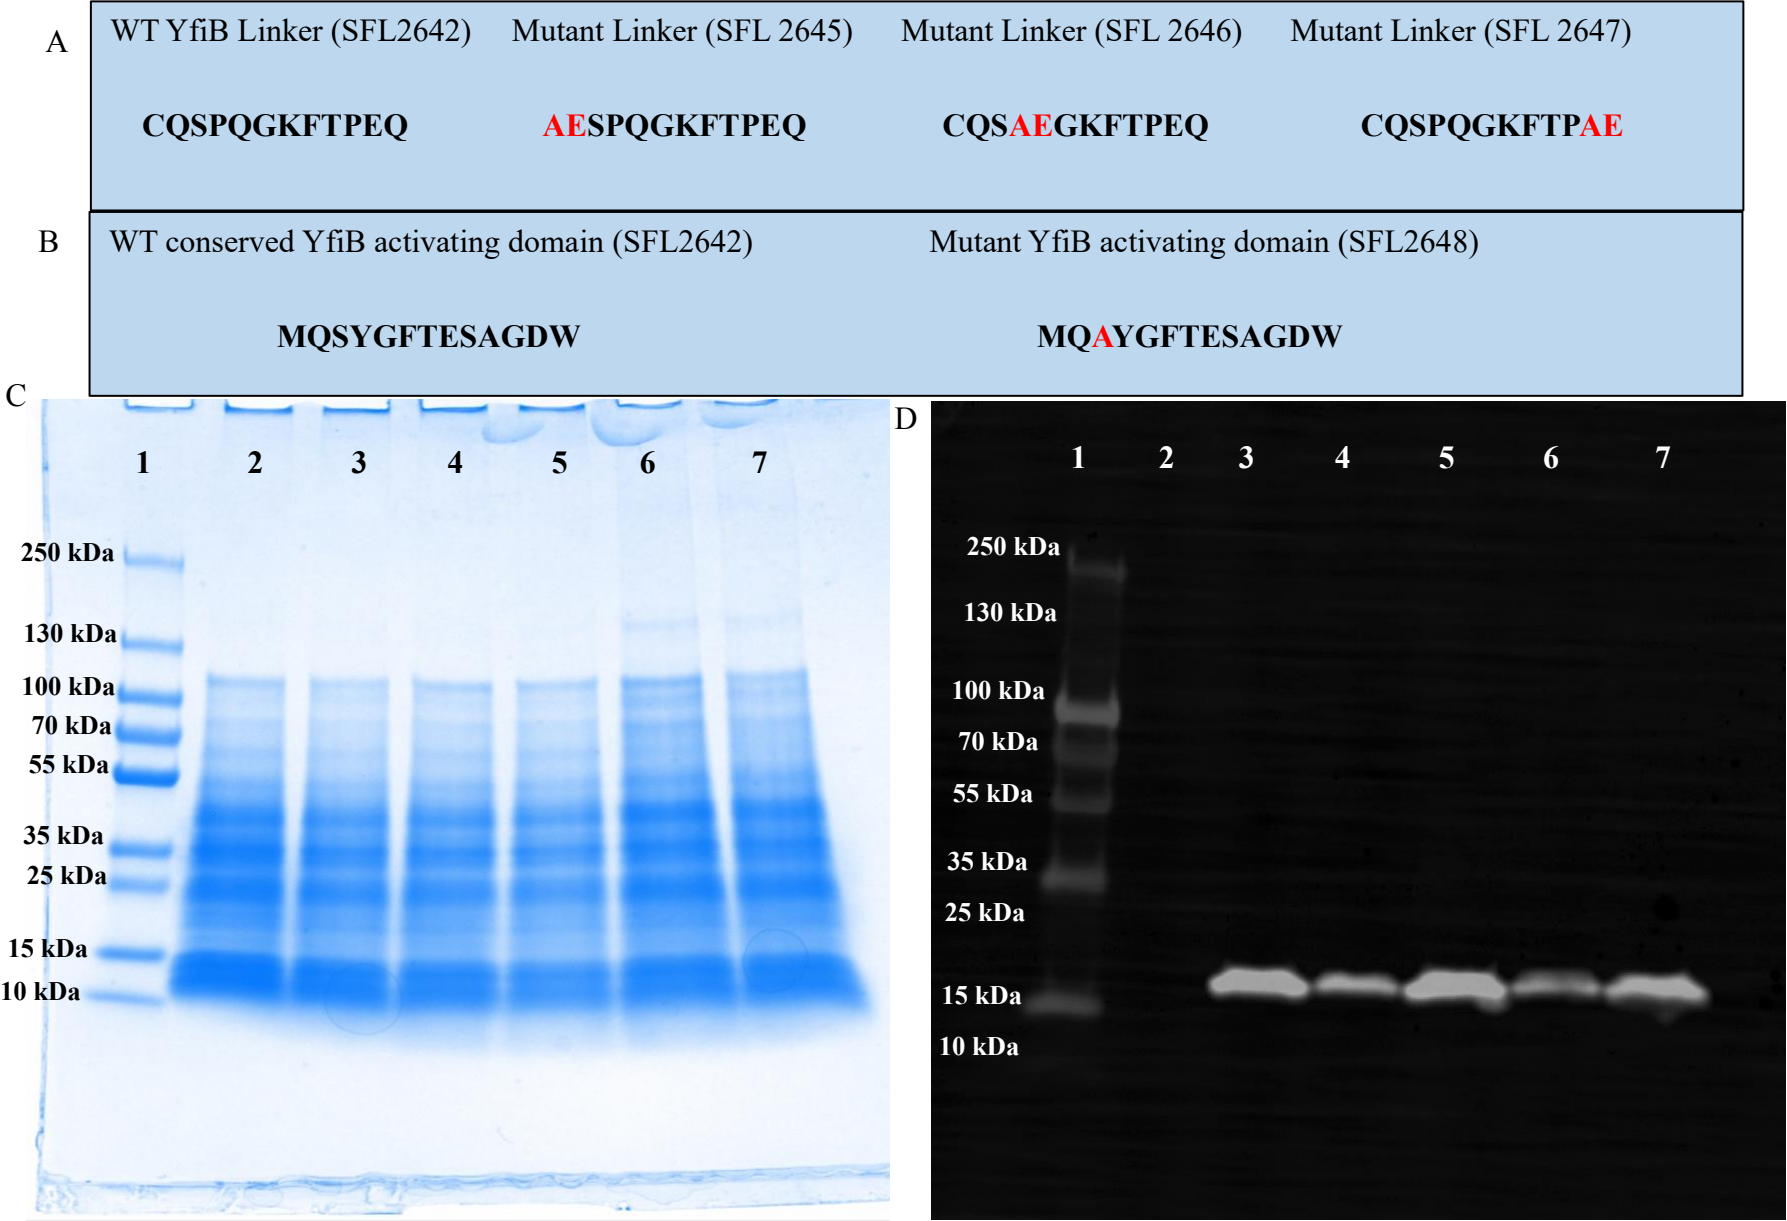

Supplement: s1 [file s1]
